# Supplementary material
Source: PubMed Central journal article supplement (PMC3769175)
Supplement: NIHMS499812-supplement-acceptance_letter.pdf [file NIHMS499812-supplement-acceptance_letter.pdf]

**Michael De Bellis, M.D.**

---

**From:** onbehalfof+childmaltreatment+tcnj.edu@manuscriptcentral.com on behalf of childmaltreatment@tcnj.edu  
**Sent:** Wednesday, June 19, 2013 11:09 AM  
**To:** Michael De Bellis, M.D.  
**Subject:** Child Maltreatment - Decision on Manuscript ID CM-12-060.R2

19-Jun-2013

Dear Dr. De Bellis:

It is a pleasure to accept your manuscript entitled "Neuropsychological Findings in Pediatric Maltreatment: Relationship of PTSD, Dissociative Symptoms, and Abuse/Neglect Indices to Neurocognitive Outcomes" in its current form for publication in Child Maltreatment.

You will very shortly receive an email with electronic copyright form information for Sage Publications. Please use the links to e-sign and submit your copyright form. Your manuscript will not be exported for publication without the copyright form.

Thank you for your excellent contribution. We will look forward to seeing your work published in the Special Issue. On behalf of the Editorial Board of Child Maltreatment, we look forward to your continued contributions to the Journal.

Best regards,

|                                                                                                                                                                                                                                                     |                                                      |
|-----------------------------------------------------------------------------------------------------------------------------------------------------------------------------------------------------------------------------------------------------|------------------------------------------------------|
| Sheree Toth, Ph.D.<br>Editor, Child Maltreatment<br><a href="mailto:childmaltreatment@tcnj.edu">childmaltreatment@tcnj.edu</a><br><a href="http://mc.manuscriptcentral.com/childmaltreatment">http://mc.manuscriptcentral.com/childmaltreatment</a> | Dante Cicchetti, Ph.D.<br>Editor, Child Maltreatment |
|-----------------------------------------------------------------------------------------------------------------------------------------------------------------------------------------------------------------------------------------------------|------------------------------------------------------|

---
